# Supplementary material
Source: PubMed Central journal article supplement (PMC2241652)
Supplement: 7601980s2.pdf [file 7601980s2.pdf]

Supplementary Figure 2: Targeting of EGFP-Eps15 EH1-3 to the trans Golgi network (TGN) in cells overexpressing  $\gamma$ BAR-Stonin2.

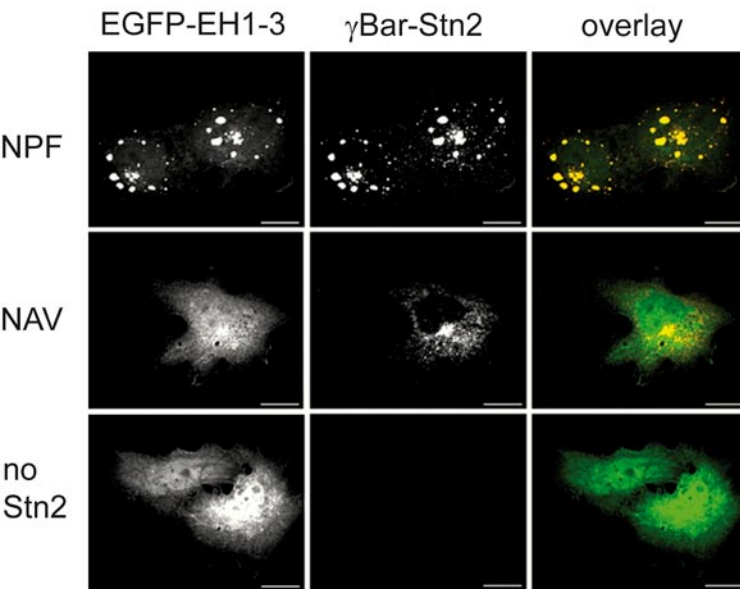

Stonin2 mediated recruitment of Eps15-EH1-3 to the TGN. The co-localization of a chimeric protein of the stonin2 NPF region fused to a TGN-localized fragment of  $\gamma$ BAR ( $\gamma$ Bar-Stn2) and Eps15 EH1-3 was analyzed using anti-myc antibodies. EH1-3 is efficiently targeted to the TGN by stonin2 in an NPF dependent manner.
