# Supplementary material
Source: PubMed Central journal article supplement (PMC2241652)
Supplement: 7601980s3.pdf [file 7601980s3.pdf]

Supplementary Figure 3: NMR Relaxation Data.

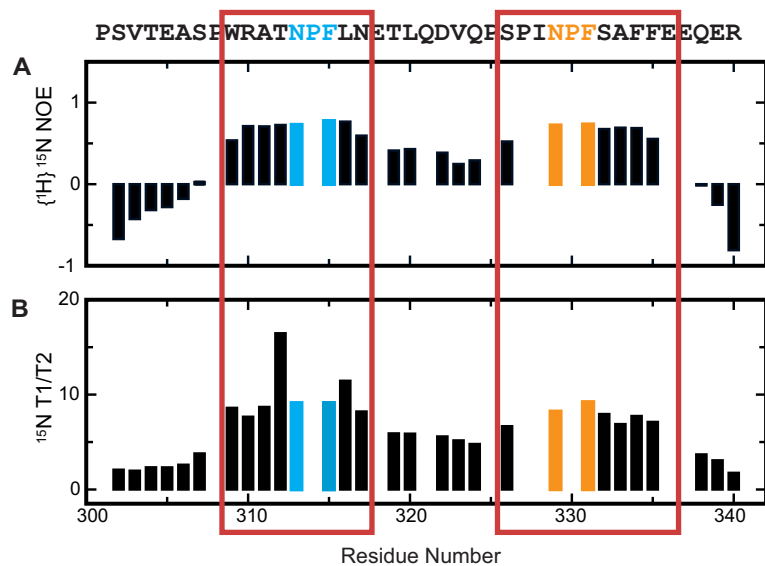

NMR Relaxation Data of stonin2 (aa 301-340) bound to Eps15-EH2. (A) Hetero-<sup>1</sup>H-<sup>15</sup>N-nuclear Overhauser effect (NOE) data show that stonin2 exhibits two regions with decreased mobility (red boxes) around each of its NPF motifs (colored in cyan and orange), indicating that these regions bind to the EH domain. (B) Consistent with this binding mode <sup>15</sup>N T<sub>1</sub>/T<sub>2</sub> relaxation data also show two regions of decreased flexibility around the NPF motifs.
