# Supplementary material
Source: PubMed Central journal article supplement (PMC2241652)
Supplement: 7601980s6.pdf [file 7601980s6.pdf]

Supplementary Figure 6: Interaction of EH domains from different proteins with Stonin2.

| <b>Protein</b>     | <b>Residues</b> | <b><math>\Delta H</math> [kcal/mol]</b> | <b><math>K_d</math> [<math>\mu M</math>]</b> |
|--------------------|-----------------|-----------------------------------------|----------------------------------------------|
| Eps15 EH1          | 1-120           | -8.3                                    | 75                                           |
| Eps15 EH2          | 121-215         | -10.9                                   | 0.15                                         |
| Eps15 EH3          | 217-313         | ND                                      |                                              |
| Eps15R EH2         | 120-214         | -5.8                                    | 0.87                                         |
| EHD1               | 438-534         | -11.0                                   | 23                                           |
| Reps1              | 226-314         | -6.6                                    | 19                                           |
| Intersectin1 EH1-2 | 13-309          | ND                                      |                                              |
| Intersectin2 EH1-2 | 13-330          | ND                                      |                                              |

Binding affinities of different EH domains for the NPF region of stonin2 (residues 301-340). High affinity interactions are only observed for the second EH domain of Eps15 and Eps15R. ND= not detected.
